# Supplementary material for: Weak magnetic field enhances the activation of peroxymonosulfate by ZnO@Fe3O4
Source: Royal Society of Chemistry journal article supplement (doi:10.1039/c8ra03108h), 2018-01-01
Supplement: c8ra03108h1.pdf [file c8ra03108h1.pdf]

### Supplementary Material

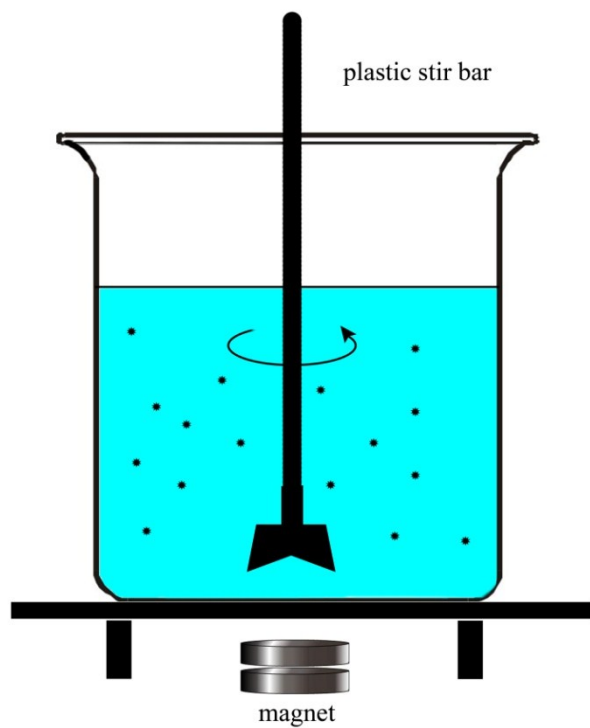

**Scheme. S1** The simulation diagram of experimental procedure.

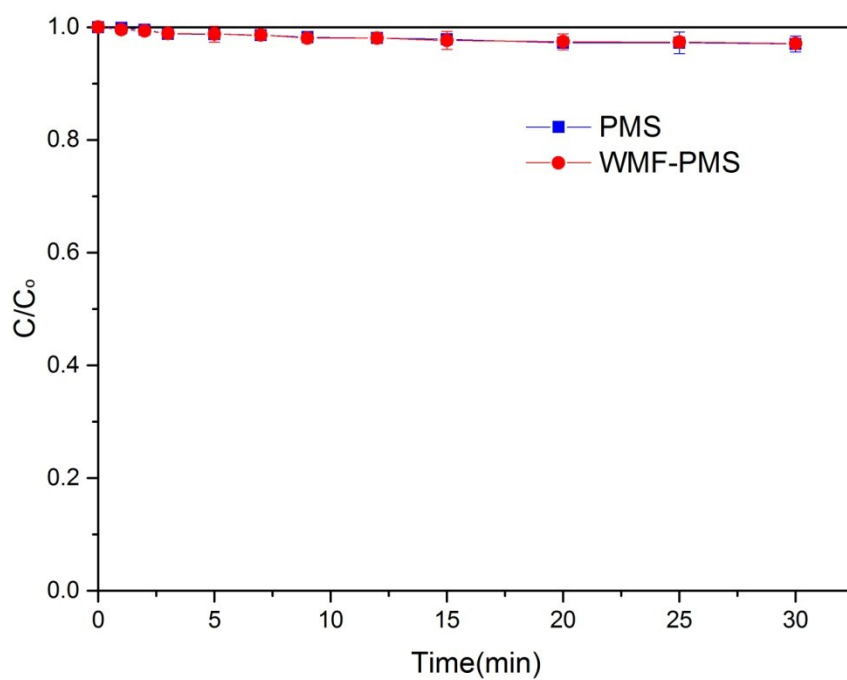

**Fig. S1** AO7 minimal removal by PMS. Reaction conditions:  $[PMS]_0=5 \times 10^{-4}M$ ,  $[AO7]_0=0.02mM$ ,  $pH=6.0$ .  $C$  and  $C_0$  are AO7 concentration at time  $t$  and initial.

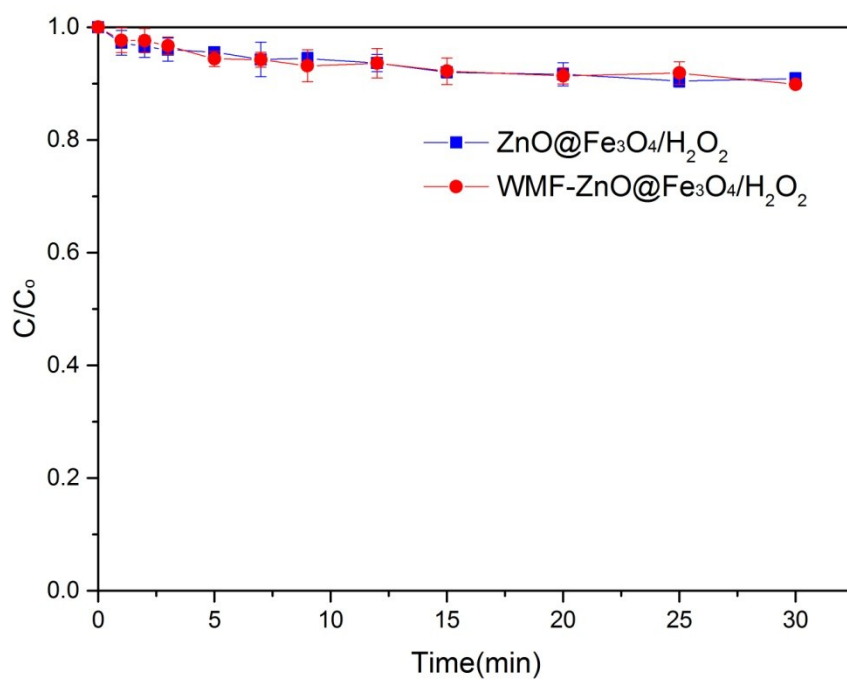

**Fig. S2** AO7 minimal removal by ZnO@Fe<sub>3</sub>O<sub>4</sub>/H<sub>2</sub>O<sub>2</sub> system. Reaction conditions: [H<sub>2</sub>O<sub>2</sub>]<sub>0</sub>=5×10<sup>-4</sup>M, [AO7]<sub>0</sub>=0.02mM, pH=6.0. C and C<sub>0</sub> are AO7 concentration at time t and initial.

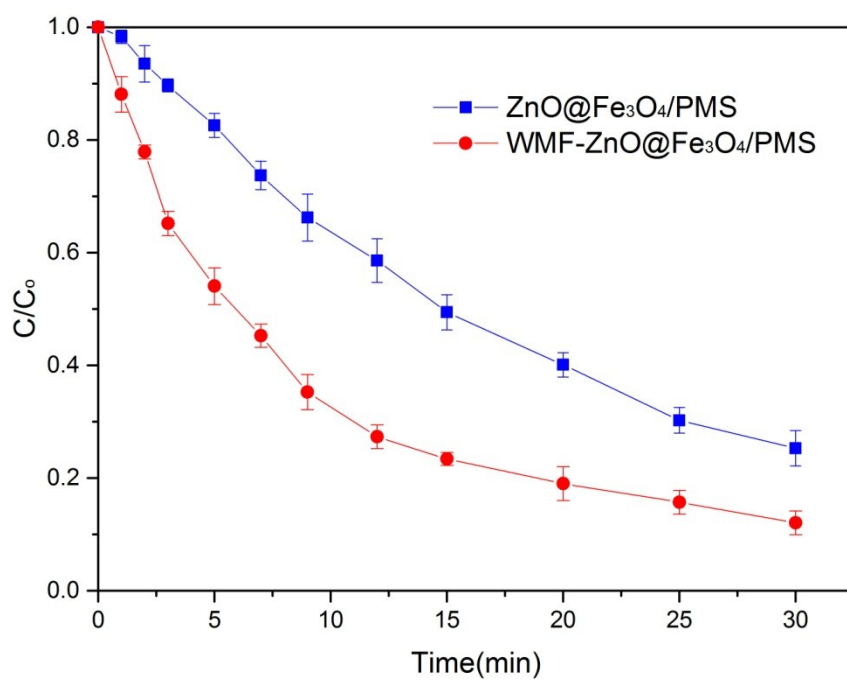

**Fig. S3** AO7 removal by ZnO@Fe<sub>3</sub>O<sub>4</sub>/PMS system under N<sub>2</sub> inert atmosphere. Reaction conditions: [PMS]<sub>0</sub>=5 × 10<sup>-4</sup>M, [AO7]<sub>0</sub>=0.02mM, pH=6.0, DO=0.07mgL<sup>-1</sup>. C and C<sub>0</sub> are AO7 concentration at time t and initial.

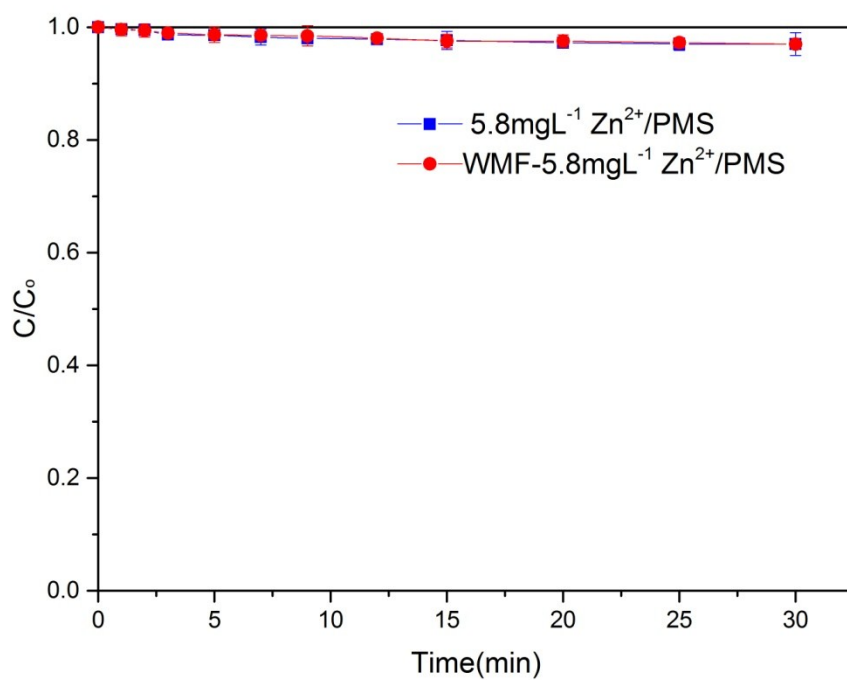

**Fig. S4** AO7 minimal removal by 5.8mgL<sup>-1</sup> Zn<sup>2+</sup>. Reaction conditions: [PMS]<sub>0</sub>=5×10<sup>-4</sup>M, [AO7]<sub>0</sub>=0.02mM, pH=6.0. C and C<sub>0</sub> are AO7 concentration at time t and initial.
